# Supplementary material for: Enhanced biomineralization of shape memory composite scaffolds from citrate functionalized amorphous calcium phosphate for bone repair
Source: Royal Society of Chemistry journal article supplement (doi:10.1039/d1tb01554k), 2021-01-01
Supplement: d1tb01554k3.pdf [file d1tb01554k3.pdf]

Supporting information

## Enhanced Biomineralization of Shape Memory Composite Scaffold from Citrate Functionalized Amorphous Calcium Phosphate for Bone Repair

Kun Luo<sup>1</sup>, Li Wang<sup>1,2\*</sup>, Jiajing Tang<sup>3</sup>, Xiyang Zeng<sup>1</sup>, Xiaohu Chen<sup>1</sup>, Peicong Zhang<sup>1</sup>, Shiyi Zhou<sup>1</sup>, Junfeng Li<sup>1</sup>, Yi Zuo<sup>3</sup>

<sup>1</sup> College of Materials, Chemistry & Chemical Engineering, Chengdu University of Technology, Chengdu 610059, Sichuan, P. R. China

<sup>2</sup> College of Chemistry, Sichuan University, Chengdu 610064, China

<sup>3</sup> Research center for nano-biomaterials, Analytical & Testing Center, Sichuan University, Chengdu 610064, China

\*Corresponding author, E-mail addresses: [wangli18@cdut.edu.cn](mailto:wangli18@cdut.edu.cn)

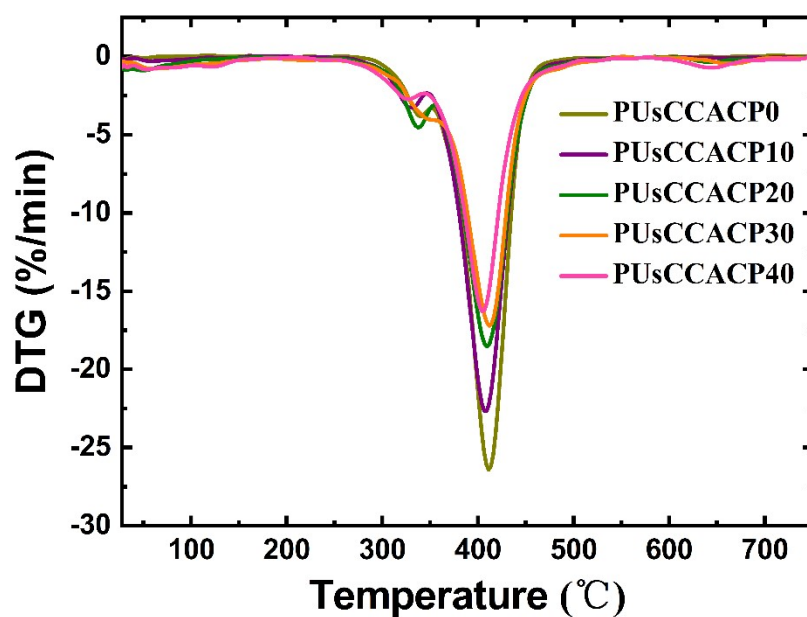

**Fig. S1.** DTG curve of porous PUsCCACP scaffolds with different CCACP content.

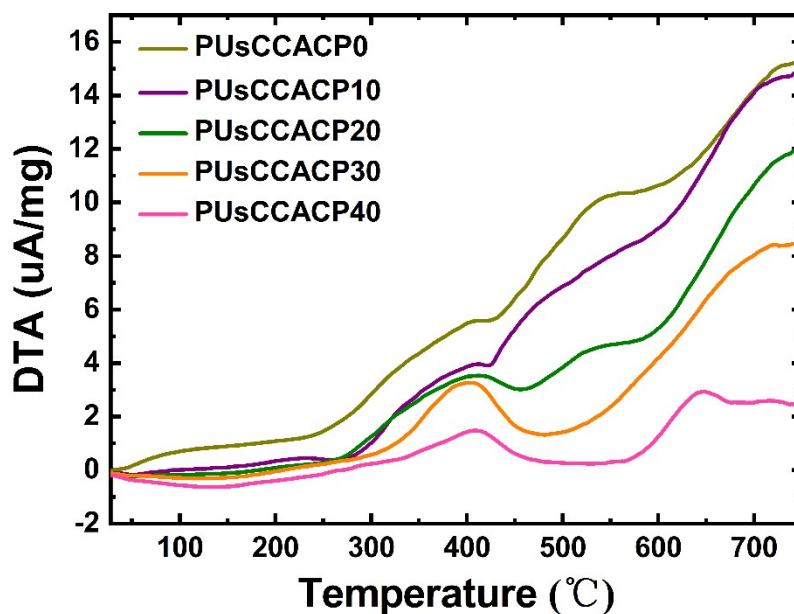

**Fig. S2.** DTA curve of porous PUsCCACP scaffolds with different CCACP content.

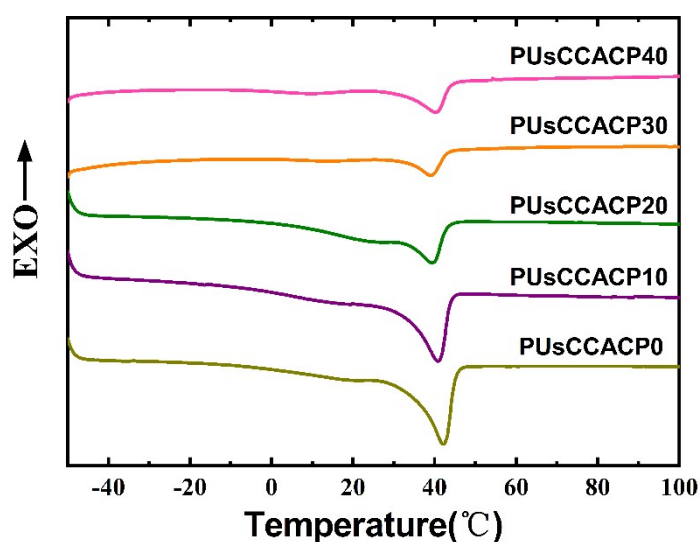

**Fig. S3.** DSC thermograms of 2nd heating run for PUsCCACP scaffolds.

**Table. S1** The parameter of crystal structure and thermal for scaffolds with varied CCACP content.

| Sample                  | <sup>a</sup> X <sub>c</sub> (%) | <sup>a</sup> L <sub>c</sub> (nm) | <sup>b</sup> T <sub>m</sub> (°C) | ΔH <sub>m</sub> (J·g <sup>-1</sup> ) | T <sub>c</sub> (°C) | ΔH <sub>c</sub> (J·g <sup>-1</sup> ) |
|-------------------------|---------------------------------|----------------------------------|----------------------------------|--------------------------------------|---------------------|--------------------------------------|
| PU <sub>s</sub> CCACP0  | 53.22%                          | 6.27                             | 42.05                            | 67.87                                | 11.1                | 46.52                                |
| PU <sub>s</sub> CCACP10 | 50.19%                          | 6.22                             | 40.76                            | 62.03                                | 17.91               | 47.21                                |
| PU <sub>s</sub> CCACP20 | 47.00%                          | 6.20                             | 39.55                            | 51.11                                | 18.12               | 42.27                                |
| PU <sub>s</sub> CCACP30 | 43.13%                          | 3.71                             | 39.19                            | 22.59                                | 21.83               | 17.21                                |
| PU <sub>s</sub> CCACP40 | 40.50%                          | 1.31                             | 40.19                            | 31.66                                | 22.34               | 22.86                                |

<sup>a</sup>X<sub>c</sub> and L<sub>c</sub> represent crystallinity and crystallites size of scaffolds which determined by the results of X-ray diffractometer.

<sup>b</sup> Thermodynamic parameters were determined from the second cycle.

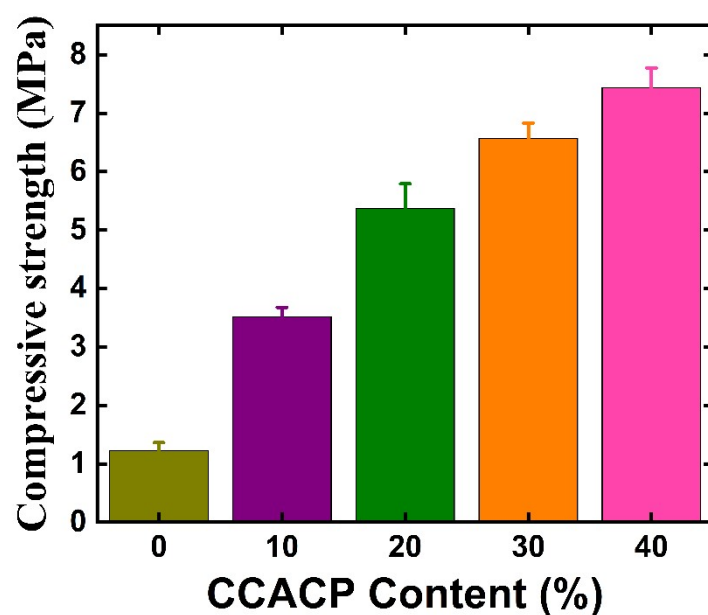

**Fig. S4.** Bar chart with compressive strength for PUsCCACP scaffold with various CCACP content at stain of 60% (n=5).

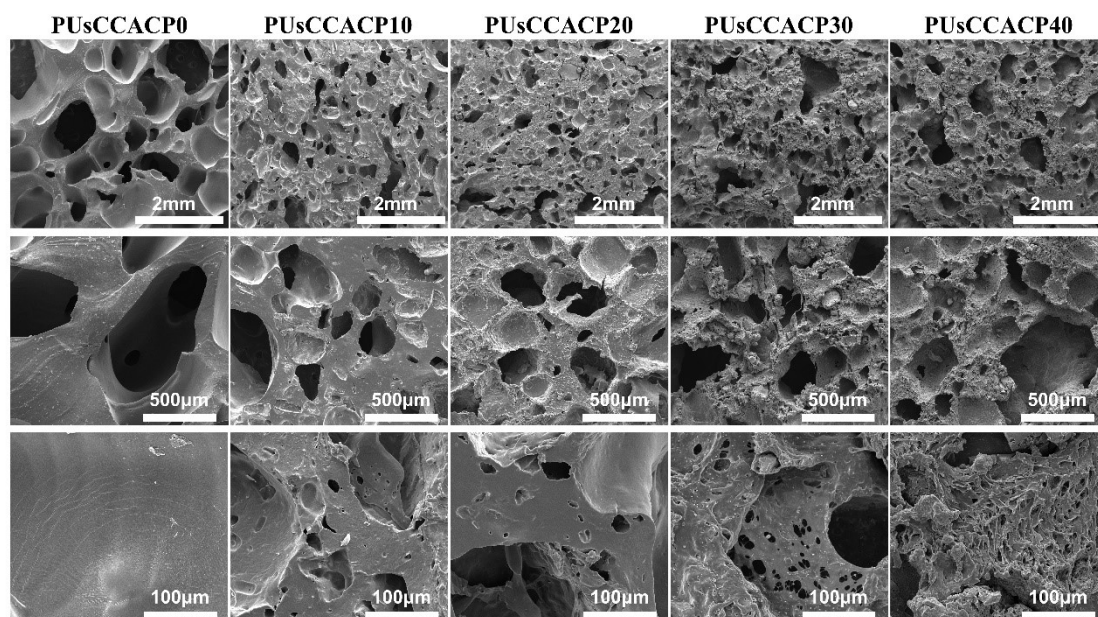

**Fig. S5.** SEM images of PUsCCACP scaffolds with various CCACP content

**Table. S2** Physical and mechanical properties of scaffolds with different CCACP content.

| Sample     | <sup>a</sup> Porosity (%) | Density (g/cm <sup>3</sup> ) | <sup>b</sup> Stress (Mpa) | Modulus (Mpa)  |
|------------|---------------------------|------------------------------|---------------------------|----------------|
| PUsCCACP0  | 81.83±0.73                | 0.19±0.01                    | 1.22 ± 0.14               | 20.16 ± 4.36   |
| PUsCCACP10 | 77.88±1.07                | 0.26±0.02                    | 3.52 ± 0.16               | 99.33 ± 17.56  |
| PUsCCACP20 | 70.77±1.77                | 0.38±0.03                    | 5.37 ± 0.42               | 123.33 ± 10.74 |
| PUsCCACP30 | 69.27±2.23                | 0.40±0.02                    | 6.57 ± 0.26               | 148.40 ± 8.08  |

PU<sub>s</sub>CCACP0      64.59±0.78      0.43±0.01      7.44 ± 0.33      168.50 ± 9.42

<sup>a</sup> Essential parameter of scaffolds were evaluated by ceramic bulk density tester which based on the Archimedes principle.

<sup>b</sup> Mechanical date were determined by tensile testing of independent sample (n =3).

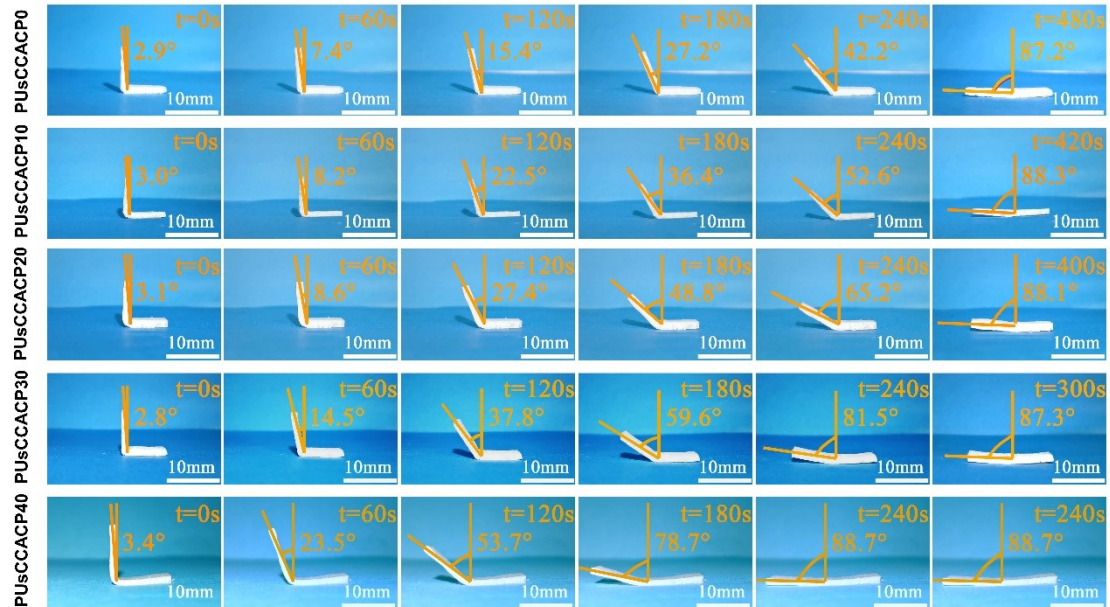

**Fig. S6.** Visual demonstration of shape-memory for PU<sub>s</sub>CCACP scaffolds with different CCACP content at 40 °C.

**Table. S3.** The shape fixed rate and shape recovered rate of PU<sub>s</sub>CCACP scaffolds with different CCACP content.

| Sample                  | <sup>a</sup> <i>R<sub>f</sub></i> (%) | <sup>a</sup> <i>R<sub>r</sub></i> (%) |
|-------------------------|---------------------------------------|---------------------------------------|
| PU <sub>s</sub> CCACP0  | 97.41 ± 0.93                          | 97.63 ± 1.02                          |
| PU <sub>s</sub> CCACP10 | 97.04 ± 0.29                          | 98.19 ± 1.09                          |
| PU <sub>s</sub> CCACP20 | 98.15 ± 0.46                          | 98.11 ± 0.74                          |
| PU <sub>s</sub> CCACP30 | 97.04 ± 0.55                          | 97.07 ± 1.00                          |
| PU <sub>s</sub> CCACP40 | 96.59 ± 0.28                          | 97.96 ± 0.76                          |

<sup>a</sup> Determined from the shape recovery bending test.

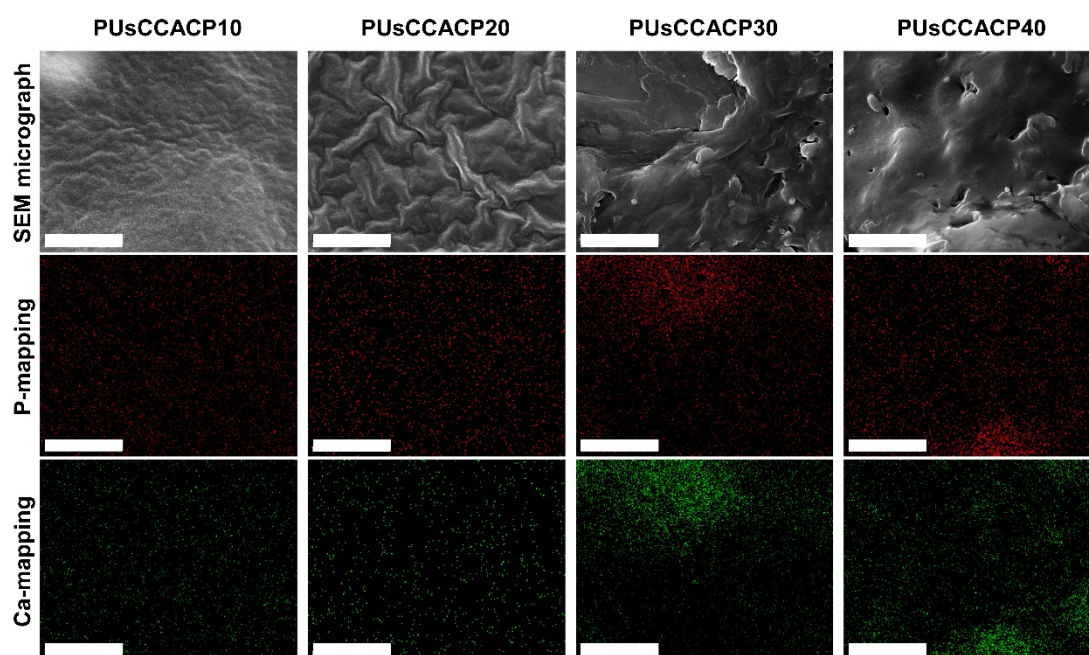

**Fig. S7.** SEM micrographs and EDS mapping for PUsCCACP scaffolds prior to SBF immersion (scale bar: 10  $\mu$ m).

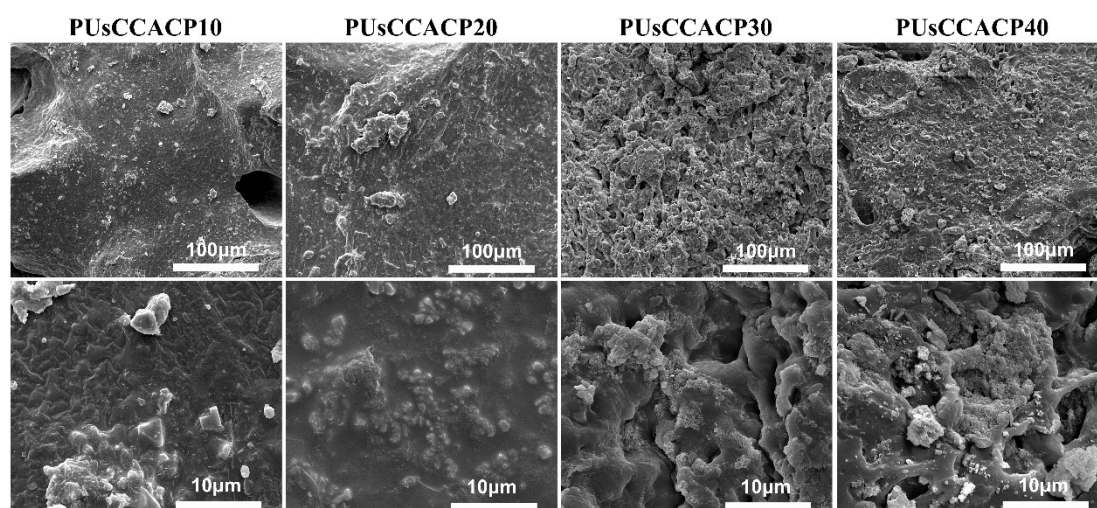

**Fig. S8.** SEM images of porous PUsCCACP scaffolds with different CCACP content soaking in SBF.

**Table. S4.** Mass remnant (%) and CCACP remnant (%) of scaffolds with different CCACP content.

| Sample      | <sup>a</sup> Mass loss (%) | <sup>b</sup> Mass remnant (%) | <sup>c</sup> CCACP remanant (%) |
|-------------|----------------------------|-------------------------------|---------------------------------|
| PU sCCACP0  | 4.05 $\pm$ 0.23            | 95.95 $\pm$ 0.23              |                                 |
| PU sCCACP10 | 10.28 $\pm$ 0.29           | 89.72 $\pm$ 0.29              | 3.77 $\pm$ 0.29                 |
| PU sCCACP20 | 13.40 $\pm$ 0.58           | 86.60 $\pm$ 0.58              | 10.66 $\pm$ 0.58                |
| PU sCCACP30 | 18.39 $\pm$ 0.47           | 81.61 $\pm$ 0.47              | 15.66 $\pm$ 0.47                |
| PU sCCACP40 | 20.34 $\pm$ 0.45           | 79.66 $\pm$ 0.45              | 23.71 $\pm$ 0.45                |

<sup>a</sup> Mass loss was confirmed by the in vitro degradation test.

<sup>b</sup> Mass remnant was calculated by the following formula:

$$\text{Mass remnant (\%)} = (1 - {}^a\text{Mass loss}) \times 100 \%$$

<sup>c</sup> CCACP remnant was calculated by the following formula:

$$\text{CCACP remnant (\%)} = [\text{Original CCACP content} - ({}^a\text{Mass loss} - \text{pure scaffold mass loss})] \times 100 \%$$

Note: Pure scaffold mass loss was set as 4.05 % which was the mass loss of PUsCCACP0 scaffold.

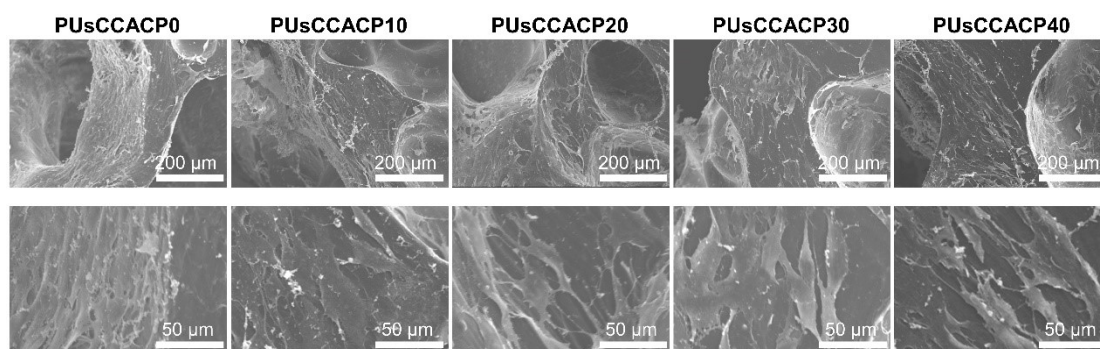

**Fig. S9.** The adhesion behaviors of MG63 cells after culturing on PUsCCACP scaffolds with different CCACP content.

**Video S1.** Bending recovery experiments of PUsCCACP20.

**Video S2.** Compression recovery experiments of PUsCCACP20.

**Video S3.** PUsCCACP20 scaffold was recovered at 37 °C in water bath.
